# Supplementary material for: Design and application of a paper-based optoelectronic nose for the on-site discrimination of essential oils using a chemometric web app
Source: Royal Society of Chemistry journal article supplement (doi:10.1039/d3ay00683b), 2023-01-01
Supplement: d3ay00683b1.pdf [file d3ay00683b1.pdf]

## SUPPLEMENTARY INFORMATION

### **Design and application of a paper-based optoelectronic nose for the on-site discrimination of essential oils using a chemometric web app**

Bárbara Cristina Dias<sup>1</sup>, Licarion Pinto<sup>2</sup> and João Flávio da Silveira Petrucci<sup>1\*</sup>

Federal University of Uberlândia (UFU), Institute of Chemistry, Uberlândia, MG,  
Brazil

State University of Rio de Janeiro (UERJ), Rio de Janeiro, RJ, Brazil

\*Corresponding author's e-mail: [jfpetrucci@gmail.com](mailto:jfpetrucci@gmail.com)

### Preparation of dyes solutions used in the optoelectronic nose

Each dye used in this study was prepared by weighing an appropriate mass and dissolved in a convenient solvent. The concentration of each dye was 1 mg mL<sup>-1</sup>. Table S1 shows in which solvent each dye was prepared.

**Table S1.** Preparation of dyes used in the colorimetric sensor array.

| Spot | Dye               | Solvent                         |
|------|-------------------|---------------------------------|
| 1    | Mn-TPY            | Dichloromethane/ethanol (90:10) |
| 2    | Methyl orange     | H <sub>2</sub> O                |
| 3    | Bromocresol green | Ethanol                         |
| 4    | Methyl Red        | Ethanol                         |
| 5    | Alizarin          | H <sub>2</sub> O                |
| 6    | Nile Red          | Ethanol                         |
| 7    | Eriocromiocyanin  | 0,01 M HCl                      |
| 8    | Disperse Orange   | Acetone                         |
| 9    | 2,4-DNPH          | Ethanol/HCl/H <sub>2</sub> O    |



**Figure S2.** Euclidean distances versus time after exposure to the essential oil mixtures.

**Table S2.** 3 to 8 bits equivalence for color enhancement.

| 3 Bits<br>Value) | 8 bits<br>Value |
|------------------|-----------------|------------------|-----------------|------------------|-----------------|------------------|-----------------|
| 0                | 1               | 2                | 65              | 4                | 129             | 6                | 191             |
| 0,03125          | 2               | 2,03125          | 66              | 4,03125          | 130             | 6,03125          | 192             |
| 0,0625           | 3               | 2,0625           | 67              | 4,0625           | 131             | 6,0625           | 193             |
| 0,09375          | 4               | 2,09375          | 68              | 4,09375          | 132             | 6,09375          | 194             |
| 0,125            | 5               | 2,125            | 69              | 4,125            | 133             | 6,125            | 195             |
| 0,15625          | 6               | 2,15625          | 70              | 4,15625          | 134             | 6,15625          | 196             |
| 0,1875           | 7               | 2,1875           | 71              | 4,1875           | 135             | 6,1875           | 197             |
| 0,21875          | 8               | 2,21875          | 72              | 4,21875          | 136             | 6,21875          | 198             |
| 0,25             | 9               | 2,25             | 73              | 4,25             | 137             | 6,25             | 199             |
| 0,28125          | 10              | 2,28125          | 74              | 4,28125          | 138             | 6,28125          | 200             |
| 0,3125           | 11              | 2,3125           | 75              | 4,3125           | 139             | 6,3125           | 201             |
| 0,34375          | 12              | 2,34375          | 76              | 4,34375          | 140             | 6,34375          | 202             |
| 0,375            | 13              | 2,375            | 77              | 4,375            | 141             | 6,375            | 203             |
| 0,40625          | 14              | 2,40625          | 78              | 4,40625          | 142             | 6,40625          | 204             |
| 0,4375           | 15              | 2,4375           | 79              | 4,4375           | 143             | 6,4375           | 205             |
| 0,46875          | 16              | 2,46875          | 80              | 4,46875          | 144             | 6,46875          | 206             |
| 0,5              | 17              | 2,5              | 81              | 4,5              | 145             | 6,5              | 207             |
| 0,53125          | 18              | 2,53125          | 82              | 4,53125          | 146             | 6,53125          | 208             |
| 0,5625           | 19              | 2,5625           | 83              | 4,5625           | 147             | 6,5625           | 209             |
| 0,59375          | 20              | 2,59375          | 84              | 4,59375          | 148             | 6,59375          | 210             |
| 0,625            | 21              | 2,625            | 85              | 4,625            | 149             | 6,625            | 211             |
| 0,65625          | 22              | 2,65625          | 86              | 4,65625          | 150             | 6,65625          | 212             |
| 0,6875           | 23              | 2,6875           | 87              | 4,6875           | 151             | 6,6875           | 213             |
| 0,71875          | 24              | 2,71875          | 88              | 4,71875          | 152             | 6,71875          | 214             |
| 0,75             | 25              | 2,75             | 89              | 4,75             | 153             | 6,75             | 215             |
| 0,78125          | 26              | 2,78125          | 90              | 4,78125          | 154             | 6,78125          | 216             |
| 0,8125           | 27              | 2,8125           | 91              | 4,8125           | 155             | 6,8125           | 217             |
| 0,84375          | 28              | 2,84375          | 92              | 4,84375          | 156             | 6,84375          | 218             |
| 0,875            | 29              | 2,875            | 93              | 4,875            | 157             | 6,875            | 219             |
| 0,90625          | 30              | 2,90625          | 94              | 4,90625          | 158             | 6,90625          | 220             |
| 0,9375           | 31              | 2,9375           | 95              | 4,9375           | 159             | 6,9375           | 221             |
| 0,96875          | 32              | 2,96875          | 96              | 4,96875          | 160             | 6,96875          | 222             |
| 1                | 33              | 3                | 97              | 5                | 161             | 7                | 223             |
| 1,03125          | 34              | 3,03125          | 98              | 5,03125          | 162             | 7,03125          | 224             |
| 1,0625           | 35              | 3,0625           | 99              | 5,0625           | 163             | 7,0625           | 225             |

|         |    |         |     |         |     |         |     |
|---------|----|---------|-----|---------|-----|---------|-----|
| 1,09375 | 36 | 3,09375 | 100 | 5,09375 | 164 | 7,09375 | 226 |
| 1,125   | 37 | 3,125   | 101 | 5,125   | 165 | 7,15625 | 227 |
| 1,15625 | 38 | 3,15625 | 102 | 5,15625 | 166 | 7,1875  | 228 |
| 1,1875  | 39 | 3,1875  | 103 | 5,1875  | 167 | 7,21875 | 229 |
| 1,21875 | 40 | 3,21875 | 104 | 5,21875 | 168 | 7,25    | 230 |
| 1,25    | 41 | 3,25    | 105 | 5,25    | 169 | 7,28125 | 231 |
| 1,28125 | 42 | 3,28125 | 106 | 5,28125 | 170 | 7,3125  | 232 |
| 1,3125  | 43 | 3,3125  | 107 | 5,3125  | 171 | 7,34375 | 233 |
| 1,34375 | 44 | 3,34375 | 108 | 5,34375 | 172 | 7,375   | 234 |
| 1,375   | 45 | 3,375   | 109 | 5,375   | 173 | 7,40625 | 235 |
| 1,40625 | 46 | 3,40625 | 110 | 5,40625 | 174 | 7,4375  | 236 |
| 1,4375  | 47 | 3,4375  | 111 | 5,4375  | 175 | 7,46875 | 237 |
| 1,46875 | 48 | 3,46875 | 112 | 5,46875 | 176 | 7,5     | 238 |
| 1,5     | 49 | 3,5     | 113 | 5,5     | 177 | 7,53125 | 239 |
| 1,53125 | 50 | 3,53125 | 114 | 5,53125 | 178 | 7,5625  | 240 |
| 1,5625  | 51 | 3,5625  | 115 | 5,5625  | 179 | 7,59375 | 241 |
| 1,59375 | 52 | 3,59375 | 116 | 5,59375 | 180 | 7,625   | 242 |
| 1,625   | 53 | 3,625   | 117 | 5,625   | 181 | 7,65625 | 243 |
| 1,65625 | 54 | 3,65625 | 118 | 5,65625 | 182 | 7,6875  | 244 |
| 1,6875  | 55 | 3,6875  | 119 | 5,6875  | 183 | 7,71875 | 245 |
| 1,71875 | 56 | 3,71875 | 120 | 5,71875 | 184 | 7,75    | 246 |
| 1,75    | 57 | 3,75    | 121 | 5,75    | 185 | 7,78125 | 247 |
| 1,78125 | 58 | 3,78125 | 122 | 5,78125 | 186 | 7,8125  | 248 |
| 1,8125  | 59 | 3,8125  | 123 | 5,8125  | 187 | 7,84375 | 249 |
| 1,84375 | 60 | 3,84375 | 124 | 5,84375 | 188 | 7,875   | 250 |
| 1,875   | 61 | 3,875   | 125 | 5,875   | 189 | 7,90625 | 251 |
| 1,90625 | 62 | 3,90625 | 126 | 5,90625 | 188 | 7,9375  | 252 |
| 1,9375  | 63 | 3,9375  | 127 | 5,9375  | 189 | 7,96875 | 253 |
| 1,96875 | 64 | 3,96875 | 128 | 5,96875 | 190 | 8       | 254 |

## Classification of essential oils adulterated and non-adulterated by statistical tools

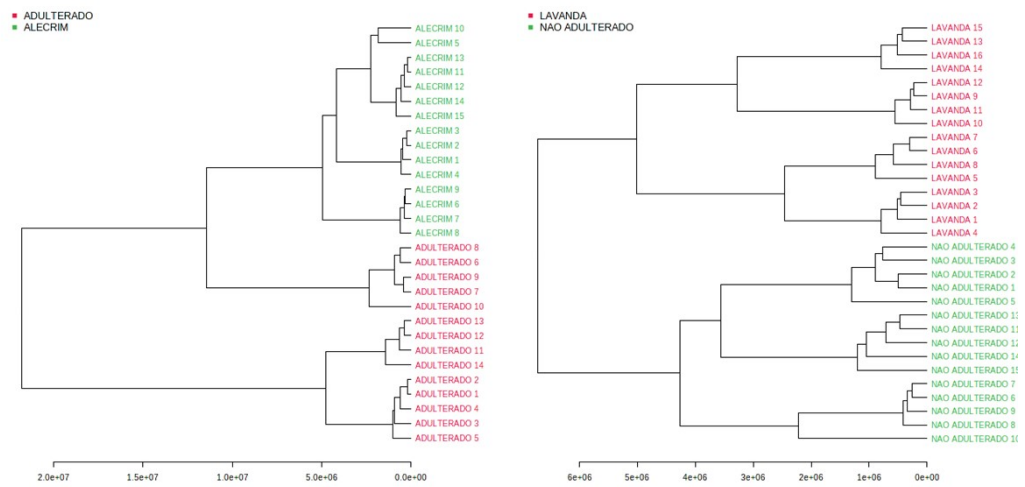

**Figure S3.** Hierarchical cluster analysis of the colorimetric array response to the essential oils adulterated and non-adulterated (A) rosemary (B) lavender.

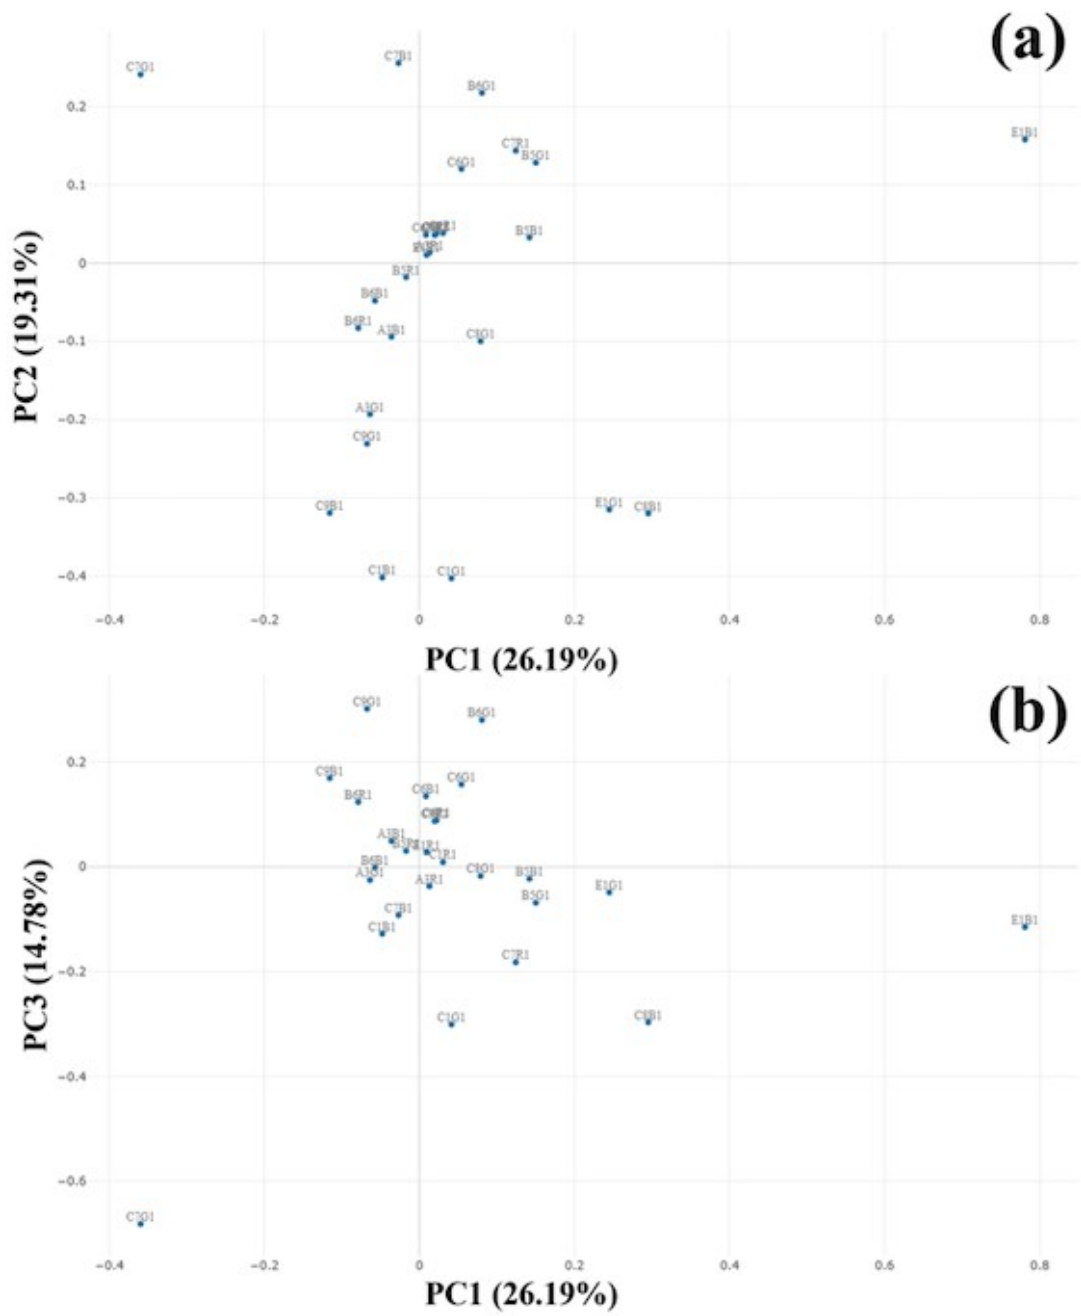

**Figure S4** Loadings plot of the RobPCA model for (a) PC1xPC2 and (b) PC1xPC3.

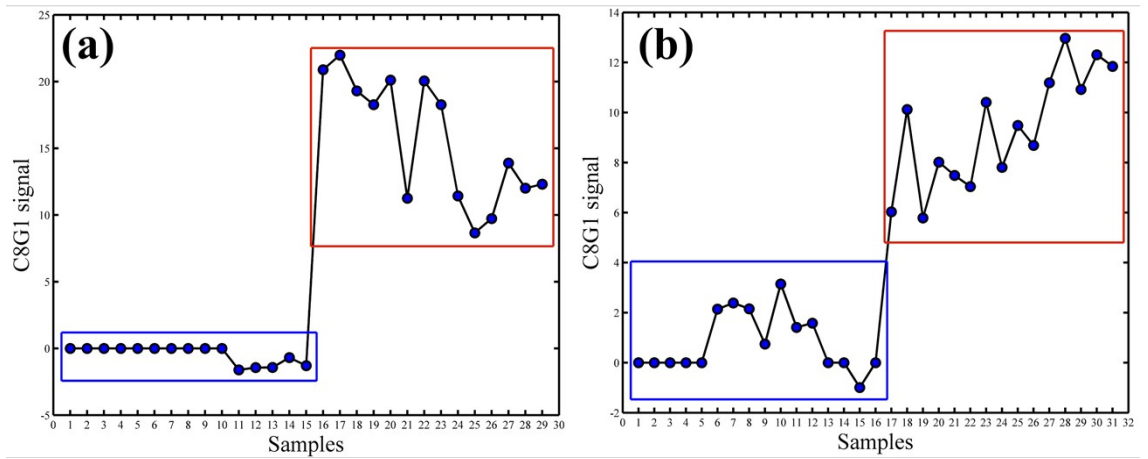

**Figure S5.** Plot of C8G1 variable versus the samples for Rosemary (a) and lavender (b). The rectangles were manually added to highlight the differences between the adulterated (red line) from the non-adulterated (blue line) samples.
